# Supplementary material
Source: MDPI journal article supplement (https://www.mdpi.com/2073-4352/9/12/660)

# checkCIF/PLATON report

Structure factors have been supplied for datablock(s) Compound\_1\_mo\_3z\_yellow

THIS REPORT IS FOR GUIDANCE ONLY. IF USED AS PART OF A REVIEW PROCEDURE FOR PUBLICATION, IT SHOULD NOT REPLACE THE EXPERTISE OF AN EXPERIENCED CRYSTALLOGRAPHIC REFEREE.

No syntax errors found.      CIF dictionary      Interpreting this report

## Datablock: Compound\_1\_mo\_3z\_yellow

---

Bond precision:    S- O = 0.0060 A                      Wavelength=0.71073

Cell:                      a=9.2021(3)              b=13.2434(5)              c=12.5610(3)  
                            alpha=90              beta=90              gamma=90  
Temperature:              293 K

|                | Calculated                | Reported                 |
|----------------|---------------------------|--------------------------|
| Volume         | 1530.77(8)                | 1530.77(8)               |
| Space group    | P n m a                   | P n m a                  |
| Hall group     | -P 2ac 2n                 | -P 2ac 2n                |
| Moiety formula | H4 O28 S4 U4, H2 O, 4(Cs) | H O7 S U, Cs, H0.5 O0.25 |
| Sum formula    | Cs4 H6 O29 S4 U4          | Cs H1.50 O7.25 S U       |
| Mr             | 2082.05                   | 520.51                   |
| Dx,g cm-3      | 4.517                     | 4.517                    |
| Z              | 2                         | 8                        |
| Mu (mm-1)      | 26.156                    | 26.156                   |
| F000           | 1780.0                    | 1780.0                   |
| F000'          | 1703.56                   |                          |
| h,k,lmax       | 11,17,16                  | 11,17,16                 |
| Nref           | 1826                      | 1824                     |
| Tmin,Tmax      | 0.296,0.593               | 0.430,1.000              |
| Tmin'          | 0.200                     |                          |

Correction method= # Reported T Limits: Tmin=0.430 Tmax=1.000  
AbsCorr = MULTI-SCAN

Data completeness= 0.999                      Theta(max)= 27.495

R(reflections)= 0.0261( 1560)              wR2(reflections)= 0.0648( 1824)

S = 1.055                      Npar= 109

---

The following ALERTS were generated. Each ALERT has the format

**test-name\_ALERT\_alert-type\_alert-level.**

Click on the hyperlinks for more details of the test.

---

### Alert level B

|                   |                      |    |        |   |              |
|-------------------|----------------------|----|--------|---|--------------|
| PLAT420_ALERT_2_B | D-H Without Acceptor | O8 | --H8AA | . | Please Check |
| PLAT420_ALERT_2_B | D-H Without Acceptor | O8 | --H8AB | . | Please Check |

---

### Alert level C

|                   |                                                  |                             |       |        |
|-------------------|--------------------------------------------------|-----------------------------|-------|--------|
| PLAT213_ALERT_2_C | Atom O5                                          | has ADP max/min Ratio ..... | 3.2   | prolat |
| PLAT250_ALERT_2_C | Large U3/U1 Ratio for Average U(i,j) Tensor .... |                             | 2.3   | Note   |
| PLAT906_ALERT_3_C | Large K Value in the Analysis of Variance .....  |                             | 2.391 | Check  |
| PLAT911_ALERT_3_C | Missing FCF Refl Between Thmin & STh/L= 0.600    |                             | 3     | Report |
| PLAT971_ALERT_2_C | Check Calcd Resid. Dens. 0.86A From U1           |                             | 2.13  | eA-3   |
| PLAT971_ALERT_2_C | Check Calcd Resid. Dens. 0.86A From U1           |                             | 2.10  | eA-3   |
| PLAT971_ALERT_2_C | Check Calcd Resid. Dens. 0.92A From Cs2          |                             | 1.56  | eA-3   |
| PLAT975_ALERT_2_C | Check Calcd Resid. Dens. 0.96A From O8A          |                             | 1.11  | eA-3   |
| PLAT977_ALERT_2_C | Check Negative Difference Density on H8AA        |                             | -0.35 | eA-3   |

---

### Alert level G

|                   |                                                  |  |        |        |
|-------------------|--------------------------------------------------|--|--------|--------|
| PLAT002_ALERT_2_G | Number of Distance or Angle Restraints on AtSite |  | 6      | Note   |
| PLAT003_ALERT_2_G | Number of Uiso or Uij Restrained non-H Atoms ... |  | 2      | Report |
| PLAT004_ALERT_5_G | Polymeric Structure Found with Maximum Dimension |  | 2      | Info   |
| PLAT042_ALERT_1_G | Calc. and Reported MoietyFormula Strings Differ  |  | Please | Check  |
| PLAT045_ALERT_1_G | Calculated and Reported Z Differ by a Factor ... |  | 0.25   | Check  |
| PLAT083_ALERT_2_G | SHELXL Second Parameter in WGHT Unusually Large  |  | 11.45  | Why ?  |
| PLAT171_ALERT_4_G | The CIF-Embedded .res File Contains EADP Records |  | 1      | Report |
| PLAT172_ALERT_4_G | The CIF-Embedded .res File Contains DFIX Records |  | 4      | Report |
| PLAT186_ALERT_4_G | The CIF-Embedded .res File Contains ISOR Records |  | 1      | Report |
| PLAT199_ALERT_1_G | Reported _cell_measurement_temperature ..... (K) |  | 293    | Check  |
| PLAT200_ALERT_1_G | Reported _diffrn_ambient_temperature ..... (K)   |  | 293    | Check  |
| PLAT300_ALERT_4_G | Atom Site Occupancy of O8 Constrained at         |  | 0.25   | Check  |
| PLAT300_ALERT_4_G | Atom Site Occupancy of O8A Constrained at        |  | 0.25   | Check  |
| PLAT300_ALERT_4_G | Atom Site Occupancy of H8AA Constrained at       |  | 0.5    | Check  |
| PLAT300_ALERT_4_G | Atom Site Occupancy of H8AB Constrained at       |  | 0.5    | Check  |
| PLAT302_ALERT_4_G | Anion/Solvent/Minor-Residue Disorder (Resd 2 )   |  | 100%   | Note   |
| PLAT720_ALERT_4_G | Number of Unusual/Non-Standard Labels .....      |  | 2      | Note   |
| PLAT794_ALERT_5_G | Tentative Bond Valency for U1 (VI) .             |  | 6.24   | Info   |
| PLAT860_ALERT_3_G | Number of Least-Squares Restraints .....         |  | 18     | Note   |
| PLAT883_ALERT_1_G | No Info/Value for _atom_sites_solution_primary . |  | Please | Do !   |
| PLAT933_ALERT_2_G | Number of OMIT Records in Embedded .res File ... |  | 3      | Note   |

---

0 **ALERT level A** = Most likely a serious problem - resolve or explain  
2 **ALERT level B** = A potentially serious problem, consider carefully  
9 **ALERT level C** = Check. Ensure it is not caused by an omission or oversight  
21 **ALERT level G** = General information/check it is not something unexpected

5 ALERT type 1 CIF construction/syntax error, inconsistent or missing data  
13 ALERT type 2 Indicator that the structure model may be wrong or deficient  
3 ALERT type 3 Indicator that the structure quality may be low  
9 ALERT type 4 Improvement, methodology, query or suggestion  
2 ALERT type 5 Informative message, check

---

---

It is advisable to attempt to resolve as many as possible of the alerts in all categories. Often the minor alerts point to easily fixed oversights, errors and omissions in your CIF or refinement strategy, so attention to these fine details can be worthwhile. In order to resolve some of the more serious problems it may be necessary to carry out additional measurements or structure refinements. However, the purpose of your study may justify the reported deviations and the more serious of these should normally be commented upon in the discussion or experimental section of a paper or in the "special\_details" fields of the CIF. checkCIF was carefully designed to identify outliers and unusual parameters, but every test has its limitations and alerts that are not important in a particular case may appear. Conversely, the absence of alerts does not guarantee there are no aspects of the results needing attention. It is up to the individual to critically assess their own results and, if necessary, seek expert advice.

### **Publication of your CIF in IUCr journals**

A basic structural check has been run on your CIF. These basic checks will be run on all CIFs submitted for publication in IUCr journals (*Acta Crystallographica*, *Journal of Applied Crystallography*, *Journal of Synchrotron Radiation*); however, if you intend to submit to *Acta Crystallographica Section C* or *E* or *IUCrData*, you should make sure that full publication checks are run on the final version of your CIF prior to submission.

### **Publication of your CIF in other journals**

Please refer to the *Notes for Authors* of the relevant journal for any special instructions relating to CIF submission.

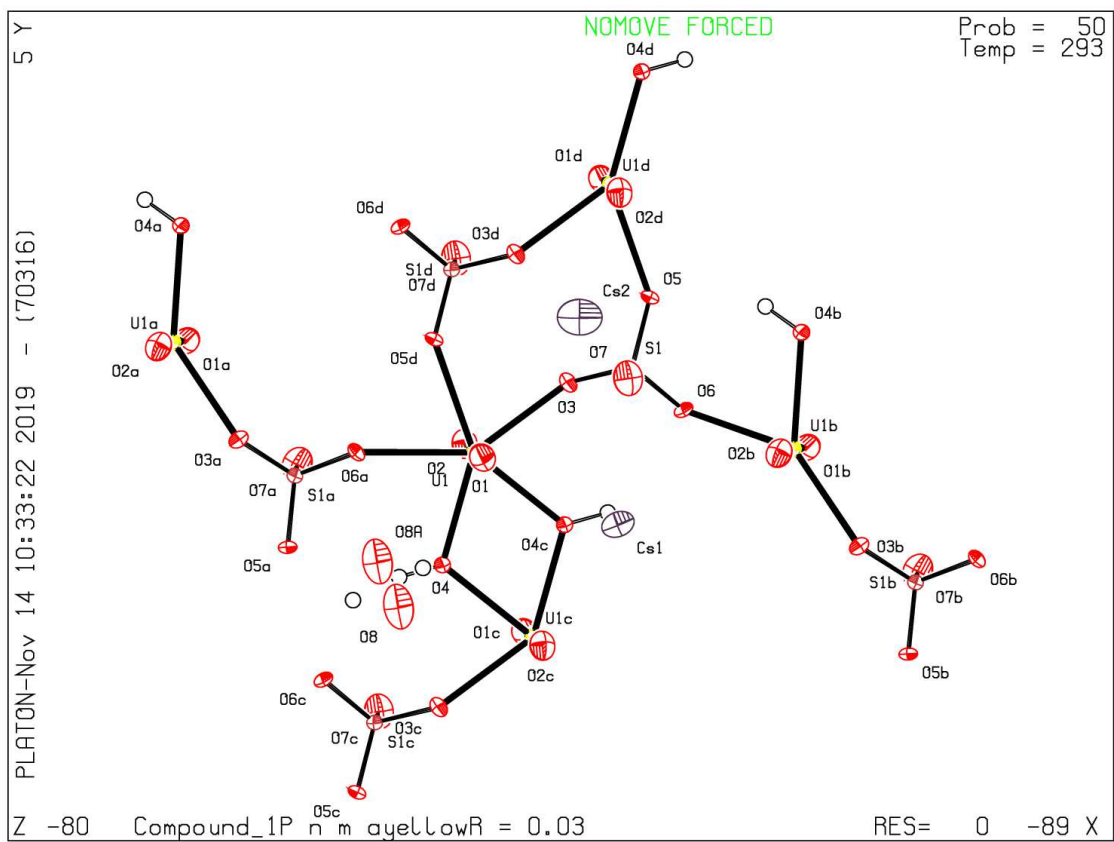

Supplement: s1 [file s1]
